# Supplementary material for: Depression, depressive symptoms and treatments in women who have recently given birth: UK cohort study
Source: PubMed Central journal article supplement (PMC6224756; doi:10.1136/bmjopen-2018-022152), 2018-10-24
Supplement: bmjopen-2018-022152supp001.pdf [file bmjopen-2018-022152supp001.pdf]

STable 1. Rates and relative risk estimates of depression diagnosis, postnatal depression diagnosis and depression symptoms in the first year after delivery for 142,234 women who gave birth between 2000 and 2013 and had no prior record suggestive of depression. Adjusted by age group, calendar period, and Townsend deprivation index. RR = relative risk.

|                                            | Depression diagnosis |                     | Postnatal depression diagnosis |                     | Depression symptom |                     |
|--------------------------------------------|----------------------|---------------------|--------------------------------|---------------------|--------------------|---------------------|
|                                            | Rate per 100         | Adjusted RR         | Rate per 100                   | Adjusted RR         | Rate per 100       | Adjusted RR         |
| <b>Age group</b>                           |                      |                     |                                |                     |                    |                     |
| 15-20                                      | 4.9 (4.4 to 5.3)     | 2.74 (2.40 to 3.13) | 6.6 (6.0 to 7.1)               | 2.88 (2.56 to 3.23) | 8.4 (7.8 to 9.0)   | 3.35 (3.01 to 3.72) |
| 20-25                                      | 3.8 (3.5 to 4.0)     | 2.21 (1.97 to 2.47) | 4.4 (4.1 to 4.7)               | 1.98 (1.80 to 2.17) | 5.2 (4.9 to 5.6)   | 2.13 (1.95 to 2.33) |
| 25-30                                      | 2.2 (2.0 to 2.4)     | 1.33 (1.21 to 1.47) | 3.0 (2.8 to 3.2)               | 1.33 (1.22 to 1.45) | 3.0 (2.8 to 3.1)   | 1.26 (1.16 to 1.37) |
| 30-35                                      | 1.6 (1.5 to 1.7)     | 1                   | 2.3 (2.1 to 2.4)               | 1                   | 2.3 (2.1 to 2.4)   | 1                   |
| 35-40                                      | 1.4 (1.3 to 1.6)     | 0.90 (0.81 to 1.01) | 2.0 (1.8 to 2.2)               | 0.89 (0.80 to 0.98) | 2.0 (1.9 to 2.2)   | 0.90 (0.82 to 0.99) |
| 40-50                                      | 1.2 (0.9 to 1.5)     | 0.75 (0.59 to 0.95) | 1.8 (1.5 to 2.1)               | 0.81 (0.67 to 0.99) | 1.8 (1.5 to 2.1)   | 0.79 (0.64 to 0.96) |
| <b>Calendar period</b>                     |                      |                     |                                |                     |                    |                     |
| 2000-2004                                  | 3.0 (2.8 to 3.2)     | 1                   | 3.9 (3.7 to 4.1)               | 1                   | 2.6 (2.4 to 2.8)   | 1                   |
| 2005-2009                                  | 2.1 (2.0 to 2.2)     | 0.67 (0.60 to 0.75) | 2.9 (2.7 to 3.0)               | 0.70 (0.64 to 0.77) | 3.4 (3.3 to 3.6)   | 1.27 (1.15 to 1.40) |
| 2010-2013                                  | 1.7 (1.6 to 1.8)     | 0.53 (0.47 to 0.60) | 2.1 (2.0 to 2.3)               | 0.52 (0.47 to 0.57) | 3.1 (2.9 to 3.2)   | 1.13 (1.01 to 1.26) |
| <b>Townsend deprivation index quantile</b> |                      |                     |                                |                     |                    |                     |
| 1                                          | 1.6 (1.5 to 1.8)     | 1                   | 2.4 (2.2 to 2.5)               | 1                   | 2.3 (2.1 to 2.4)   | 1                   |
| 2                                          | 1.9 (1.7 to 2.0)     | 1.11 (0.98 to 1.26) | 2.6 (2.4 to 2.8)               | 1.06 (0.97 to 1.17) | 2.6 (2.4 to 2.7)   | 1.05 (0.95 to 1.15) |
| 3                                          | 2.1 (2.0 to 2.3)     | 1.19 (1.05 to 1.34) | 3.0 (2.8 to 3.2)               | 1.17 (1.06 to 1.29) | 3.1 (2.9 to 3.3)   | 1.18 (1.06 to 1.31) |
| 4                                          | 2.6 (2.4 to 2.8)     | 1.34 (1.18 to 1.51) | 3.3 (3.1 to 3.5)               | 1.16 (1.04 to 1.29) | 3.8 (3.6 to 4.0)   | 1.28 (1.15 to 1.42) |
| 5                                          | 3.1 (2.8 to 3.3)     | 1.42 (1.24 to 1.64) | 3.5 (3.2 to 3.7)               | 1.10 (0.96 to 1.27) | 4.4 (4.1 to 4.7)   | 1.32 (1.18 to 1.48) |

STable 2. Rates and relative risk estimates of SSRI prescription and non-pharmacological treatment in the first year after delivery for 142,234 women who gave birth between 2000 and 2013 and had no prior record suggestive of depression. Adjusted by age group, calendar period, and Townsend deprivation index. RR = relative risk.

|                                            | SSRI prescription   |                     | Non-pharmacological treatment |                     |
|--------------------------------------------|---------------------|---------------------|-------------------------------|---------------------|
|                                            | Rate per 100        | Adjusted RR         | Rate per 100                  | Adjusted RR         |
| <b>Age group</b>                           |                     |                     |                               |                     |
| 15-20                                      | 14.2 (13.4 to 15.0) | 3.10 (2.85 to 3.37) | 3.4 (3.0 to 3.8)              | 2.48 (2.12 to 2.90) |
| 20-25                                      | 9.9 (9.4 to 10.3)   | 2.20 (2.06 to 2.36) | 2.2 (2.0 to 2.4)              | 1.60 (1.40 to 1.84) |
| 25-30                                      | 5.8 (5.5 to 6.0)    | 1.32 (1.24 to 1.41) | 1.6 (1.5 to 1.8)              | 1.21 (1.08 to 1.36) |
| 30-35                                      | 4.3 (4.1 to 4.5)    | 1                   | 1.3 (1.2 to 1.4)              | 1                   |
| 35-40                                      | 3.7 (3.5 to 3.9)    | 0.86 (0.80 to 0.93) | 1.3 (1.1 to 1.4)              | 0.94 (0.83 to 1.07) |
| 40-50                                      | 3.1 (2.7 to 3.5)    | 0.73 (0.63 to 0.84) | 1.2 (0.9 to 1.4)              | 0.87 (0.69 to 1.11) |
| <b>Calendar period</b>                     |                     |                     |                               |                     |
| 2000-2004                                  | 6.5 (6.3 to 6.8)    | 1                   | 1.2 (1.1 to 1.3)              | 1                   |
| 2005-2009                                  | 5.8 (5.7 to 6.0)    | 0.86 (0.81 to 0.91) | 1.8 (1.7 to 1.9)              | 1.42 (1.25 to 1.62) |
| 2010-2013                                  | 5.1 (4.9 to 5.3)    | 0.75 (0.70 to 0.80) | 1.7 (1.6 to 1.9)              | 1.40 (1.22 to 1.61) |
| <b>Townsend deprivation index quantile</b> |                     |                     |                               |                     |
| 1                                          | 4.5 (4.3 to 4.7)    | 1                   | 1.4 (1.2 to 1.5)              | 1                   |
| 2                                          | 4.9 (4.7 to 5.2)    | 1.05 (0.98 to 1.13) | 1.5 (1.4 to 1.6)              | 1.06 (0.92 to 1.23) |
| 3                                          | 5.9 (5.6 to 6.1)    | 1.15 (1.07 to 1.24) | 1.6 (1.5 to 1.8)              | 1.08 (0.93 to 1.24) |
| 4                                          | 6.7 (6.4 to 7.0)    | 1.18 (1.09 to 1.28) | 1.8 (1.7 to 2.0)              | 1.12 (0.97 to 1.30) |
| 5                                          | 8.0 (7.6 to 8.4)    | 1.26 (1.13 to 1.40) | 2.0 (1.8 to 2.2)              | 1.12 (0.94 to 1.32) |

STable 3. Rates and relative risk estimates of depression diagnosis, postnatal depression diagnosis and depression symptoms in the first year after delivery for 64,283 women who gave birth between 2000 and 2013 and had a prior record suggestive of depression. Adjusted by age group, calendar period, and Townsend deprivation index. RR = relative risk.

|                                            | Depression diagnosis |                     | Postnatal depression diagnosis |                     | Depression symptom  |                     |
|--------------------------------------------|----------------------|---------------------|--------------------------------|---------------------|---------------------|---------------------|
|                                            | Rate per 100         | Adjusted RR         | Rate per 100                   | Adjusted RR         | Rate per 100        | Adjusted RR         |
| <b>Age group</b>                           |                      |                     |                                |                     |                     |                     |
| 15-20                                      | 12.6 (11.3 to 14.0)  | 1.48 (1.31 to 1.67) | 11.1 (9.8 to 12.4)             | 1.50 (1.32 to 1.71) | 18.3 (16.7 to 19.9) | 1.76 (1.58 to 1.95) |
| 20-25                                      | 10.6 (10.0 to 11.2)  | 1.24 (1.15 to 1.35) | 8.2 (7.7 to 8.7)               | 1.11 (1.02 to 1.21) | 13.3 (12.7 to 14.0) | 1.29 (1.22 to 1.38) |
| 25-30                                      | 9.2 (8.7 to 9.6)     | 1.10 (1.03 to 1.17) | 7.9 (7.5 to 8.3)               | 1.07 (0.99 to 1.15) | 10.6 (10.1 to 11.1) | 1.06 (0.99 to 1.12) |
| 30-35                                      | 8.3 (7.9 to 8.7)     | 1                   | 7.6 (7.2 to 8.0)               | 1                   | 9.8 (9.3 to 10.2)   | 1                   |
| 35-40                                      | 8.0 (7.6 to 8.5)     | 0.98 (0.91 to 1.06) | 6.8 (6.3 to 7.2)               | 0.90 (0.82 to 0.97) | 9.2 (8.7 to 9.7)    | 0.95 (0.88 to 1.01) |
| 40-50                                      | 6.7 (5.8 to 7.5)     | 0.84 (0.73 to 0.97) | 5.7 (4.9 to 6.5)               | 0.78 (0.67 to 0.89) | 9.9 (8.9 to 11.0)   | 1.02 (0.91 to 1.14) |
| <b>Calendar period</b>                     |                      |                     |                                |                     |                     |                     |
| 2000-2004                                  | 12.7 (12.1 to 13.2)  | 1                   | 10.8 (10.2 to 11.3)            | 1                   | 9.1 (8.7 to 9.6)    | 1                   |
| 2005-2009                                  | 8.8 (8.4 to 9.1)     | 0.68 (0.63 to 0.74) | 7.7 (7.3 to 8.0)               | 0.71 (0.66 to 0.77) | 11.7 (11.3 to 12.1) | 1.26 (1.16 to 1.38) |
| 2010-2013                                  | 7.0 (6.7 to 7.3)     | 0.54 (0.50 to 0.59) | 5.9 (5.6 to 6.2)               | 0.54 (0.50 to 0.59) | 10.6 (10.3 to 11.0) | 1.14 (1.03 to 1.25) |
| <b>Townsend deprivation index quantile</b> |                      |                     |                                |                     |                     |                     |
| 1                                          | 7.6 (7.2 to 8.1)     | 1                   | 7.6 (7.1 to 8.0)               | 1                   | 9.2 (8.7 to 9.7)    | 1                   |
| 2                                          | 8.1 (7.6 to 8.6)     | 1.06 (0.98 to 1.16) | 7.8 (7.3 to 8.2)               | 1.04 (0.95 to 1.13) | 9.5 (9.0 to 10.1)   | 1.01 (0.93 to 1.11) |
| 3                                          | 8.5 (8.0 to 8.9)     | 1.10 (1.01 to 1.20) | 7.1 (6.6 to 7.5)               | 0.93 (0.85 to 1.03) | 10.0 (9.5 to 10.5)  | 1.04 (0.95 to 1.13) |
| 4                                          | 9.7 (9.2 to 10.2)    | 1.25 (1.15 to 1.36) | 7.7 (7.2 to 8.1)               | 1.00 (0.92 to 1.09) | 11.9 (11.4 to 12.4) | 1.21 (1.11 to 1.32) |
| 5                                          | 10.6 (10.0 to 11.1)  | 1.33 (1.20 to 1.47) | 8.2 (7.7 to 8.7)               | 1.05 (0.94 to 1.16) | 13.0 (12.4 to 13.6) | 1.29 (1.16 to 1.43) |

STable 4. Rates and relative risk estimates of SSRI prescription and non-pharmacological treatment in the first year after delivery for 64,283 women who gave birth between 2000 and 2013 and had a prior record suggestive of depression. Adjusted by age group, calendar period, and Townsend deprivation index. RR = relative risk.

|                                     | SSRI prescription   |                     | Non-pharmacological treatment |                     |
|-------------------------------------|---------------------|---------------------|-------------------------------|---------------------|
|                                     | Rate per 100        | Adjusted RR         | Rate per 100                  | Adjusted RR         |
| Age group                           |                     |                     |                               |                     |
| 15-20                               | 34.3 (32.4 to 36.3) | 1.47 (1.38 to 1.57) | 10.1 (8.8 to 11.3)            | 1.42 (1.25 to 1.62) |
| 20-25                               | 27.3 (26.4 to 28.1) | 1.18 (1.13 to 1.23) | 8.3 (7.8 to 8.9)              | 1.18 (1.09 to 1.29) |
| 25-30                               | 23.9 (23.2 to 24.5) | 1.04 (1.01 to 1.08) | 6.8 (6.4 to 7.2)              | 0.99 (0.91 to 1.06) |
| 30-35                               | 22.6 (22.0 to 23.2) | 1                   | 6.8 (6.4 to 7.1)              | 1                   |
| 35-40                               | 22.0 (21.2 to 22.7) | 0.98 (0.94 to 1.02) | 6.5 (6.0 to 6.9)              | 0.95 (0.87 to 1.04) |
| 40-50                               | 21.2 (19.8 to 22.6) | 0.94 (0.88 to 1.01) | 6.5 (5.7 to 7.4)              | 0.95 (0.83 to 1.09) |
| Calendar period                     |                     |                     |                               |                     |
| 2000-2004                           | 24.0 (23.3 to 24.8) | 1                   | 5.4 (5.0 to 5.8)              | 1                   |
| 2005-2009                           | 23.6 (23.1 to 24.1) | 0.97 (0.93 to 1.02) | 7.3 (7.0 to 7.6)              | 1.34 (1.21 to 1.49) |
| 2010-2013                           | 24.1 (23.6 to 24.6) | 0.99 (0.95 to 1.03) | 7.8 (7.5 to 8.1)              | 1.43 (1.27 to 1.61) |
| Townsend deprivation index quantile |                     |                     |                               |                     |
| 1                                   | 21.7 (21.0 to 22.4) | 1                   | 6.5 (6.0 to 6.9)              | 1                   |
| 2                                   | 22.7 (22.0 to 23.5) | 1.04 (0.99 to 1.09) | 6.8 (6.4 to 7.3)              | 1.04 (0.93 to 1.16) |
| 3                                   | 23.2 (22.5 to 23.9) | 1.04 (0.99 to 1.10) | 6.9 (6.5 to 7.3)              | 1.02 (0.92 to 1.14) |
| 4                                   | 25.0 (24.3 to 25.7) | 1.11 (1.06 to 1.16) | 7.5 (7.1 to 8.0)              | 1.10 (0.99 to 1.23) |
| 5                                   | 26.6 (25.8 to 27.4) | 1.16 (1.10 to 1.22) | 7.6 (7.2 to 8.1)              | 1.10 (0.97 to 1.25) |

STable 5. Rates of early recording (recording date within 42 days of delivery date) and odds ratio estimates of early vs. late recording (at or after 42 days) for depression diagnosis, postnatal depression diagnosis and depression symptoms in the first year after delivery for women who gave birth between 2000 and 2013. The values are calculated in datasets that only contain the women with the corresponding record within one year after delivery (number of women are given in the headers). Adjusted by age group, calendar period, Townsend deprivation index, and a prior record suggestive of depression. OR = odds ratio.

|                                                  | Depression diagnosis (N=8,815) |                     | Postnatal depression diagnosis (N=9,005) |                     | Depression symptom (N=11,318) |                     |
|--------------------------------------------------|--------------------------------|---------------------|------------------------------------------|---------------------|-------------------------------|---------------------|
|                                                  | Rate per 100                   | Adjusted OR         | Rate per 100                             | Adjusted OR         | Rate per 100                  | Adjusted OR         |
| <b>Age group</b>                                 |                                |                     |                                          |                     |                               |                     |
| 15-20                                            | 8.6 (6.4 to 10.7)              | 1.23 (0.89 to 1.67) | 23.3 (20.3 to 26.3)                      | 1.43 (1.17 to 1.75) | 12.5 (10.5 to 14.5)           | 1.23 (0.98 to 1.53) |
| 20-25                                            | 8.1 (6.8 to 9.4)               | 1.00 (0.80 to 1.26) | 19.2 (17.3 to 21.1)                      | 1.04 (0.88 to 1.22) | 12.9 (11.6 to 14.3)           | 1.19 (1.00 to 1.41) |
| 25-30                                            | 8.6 (7.4 to 9.7)               | 1.00 (0.82 to 1.24) | 17.6 (16.0 to 19.1)                      | 0.91 (0.79 to 1.06) | 10.8 (9.6 to 11.9)            | 0.96 (0.81 to 1.14) |
| 30-35                                            | 8.5 (7.4 to 9.7)               | 1                   | 18.7 (17.2 to 20.3)                      | 1                   | 10.9 (9.7 to 12.0)            | 1                   |
| 35-40                                            | 9.8 (8.3 to 11.4)              | 1.14 (0.91 to 1.43) | 18.2 (16.2 to 20.2)                      | 0.95 (0.80 to 1.12) | 10.4 (9.0 to 11.8)            | 0.95 (0.78 to 1.16) |
| 40-50                                            | 10.0 (6.6 to 13.4)             | 1.12 (0.73 to 1.66) | 19.5 (15.0 to 23.9)                      | 1.03 (0.76 to 1.39) | 12.5 (9.4 to 15.6)            | 1.08 (0.79 to 1.46) |
| <b>Calendar period</b>                           |                                |                     |                                          |                     |                               |                     |
| 2000-2004                                        | 8.6 (7.5 to 9.6)               | 1                   | 17.6 (16.2 to 19.0)                      | 1                   | 8.4 (7.2 to 9.5)              | 1                   |
| 2005-2009                                        | 8.4 (7.4 to 9.3)               | 0.94 (0.79 to 1.13) | 18.0 (16.7 to 19.2)                      | 0.99 (0.87 to 1.13) | 10.9 (10.1 to 11.8)           | 1.31 (1.10 to 1.57) |
| 2010-2013                                        | 9.4 (8.3 to 10.5)              | 1.06 (0.87 to 1.28) | 21.6 (20.0 to 23.2)                      | 1.24 (1.08 to 1.42) | 13.6 (12.6 to 14.6)           | 1.65 (1.38 to 1.97) |
| <b>Townsend deprivation index quantile</b>       |                                |                     |                                          |                     |                               |                     |
| 1                                                | 8.7 (7.2 to 10.1)              | 1                   | 19.3 (17.5 to 21.1)                      | 1                   | 9.5 (8.2 to 10.8)             | 1                   |
| 2                                                | 9.0 (7.6 to 10.5)              | 1.04 (0.81 to 1.34) | 16.2 (14.5 to 18.0)                      | 0.79 (0.66 to 0.94) | 10.6 (9.2 to 12.0)            | 1.10 (0.89 to 1.36) |
| 3                                                | 8.3 (7.0 to 9.6)               | 0.94 (0.74 to 1.21) | 18.2 (16.5 to 19.9)                      | 0.91 (0.77 to 1.07) | 12.5 (11.2 to 13.8)           | 1.30 (1.07 to 1.59) |
| 4                                                | 8.7 (7.5 to 9.9)               | 0.97 (0.77 to 1.24) | 21.2 (19.4 to 23.0)                      | 1.07 (0.91 to 1.26) | 11.9 (10.7 to 13.1)           | 1.20 (0.99 to 1.46) |
| 5                                                | 9.0 (7.7 to 10.3)              | 0.99 (0.78 to 1.27) | 19.0 (17.1 to 20.9)                      | 0.89 (0.75 to 1.06) | 12.0 (10.7 to 13.3)           | 1.19 (0.98 to 1.46) |
| <b>Any prior record suggestive of depression</b> |                                |                     |                                          |                     |                               |                     |
| No                                               | 4.8 (4.0 to 5.5)               | 1                   | 15.4 (14.2 to 16.5)                      | 1                   | 8.9 (8.0 to 9.7)              | 1                   |
| Yes                                              | 10.8 (10.0 to 11.6)            | 2.43 (2.02 to 2.94) | 21.8 (20.6 to 22.9)                      | 1.58 (1.41 to 1.77) | 13.0 (12.2 to 13.8)           | 1.55 (1.37 to 1.76) |

STable 6. Rates of early recording (recording date within 42 days of delivery date) and odds ratio estimates of early vs. late recording (at or after 42 days) for SSRI prescription and non-pharmacological treatment in the first year after delivery for women who gave birth between 2000 and 2013. The values are calculated in datasets that only contain the women with the corresponding record within one year after delivery (number of women are given in the headers). Adjusted by age group, calendar period, Townsend deprivation index, and a prior record suggestive of depression. OR = odds ratio.

|                                                  | SSRI prescription (N=23,557) |                     | Non-pharmacological treatment (N=6,848) |                     |
|--------------------------------------------------|------------------------------|---------------------|-----------------------------------------|---------------------|
|                                                  | Rate per 100                 | Adjusted OR         | Rate per 100                            | Adjusted OR         |
| <b>Age group</b>                                 |                              |                     |                                         |                     |
| 15-20                                            | 17.4 (15.7 to 19.1)          | 0.99 (0.86 to 1.14) | 12.5 (9.6 to 15.4)                      | 1.01 (0.74 to 1.36) |
| 20-25                                            | 17.6 (16.5 to 18.7)          | 0.83 (0.75 to 0.92) | 11.7 (9.9 to 13.4)                      | 0.82 (0.66 to 1.03) |
| 25-30                                            | 18.6 (17.7 to 19.6)          | 0.85 (0.77 to 0.93) | 13.4 (11.7 to 15.0)                     | 0.96 (0.79 to 1.17) |
| 30-35                                            | 21.0 (20.0 to 22.0)          | 1                   | 13.8 (12.2 to 15.3)                     | 1                   |
| 35-40                                            | 21.0 (19.7 to 22.3)          | 0.96 (0.87 to 1.06) | 14.3 (12.3 to 16.3)                     | 1.03 (0.84 to 1.27) |
| 40-50                                            | 24.3 (21.5 to 27.1)          | 1.07 (0.90 to 1.26) | 16.0 (11.8 to 20.2)                     | 1.13 (0.79 to 1.57) |
| <b>Calendar period</b>                           |                              |                     |                                         |                     |
| 2000-2004                                        | 15.2 (14.2 to 16.1)          | 1                   | 12.0 (10.1 to 13.8)                     | 1                   |
| 2005-2009                                        | 18.4 (17.6 to 19.2)          | 1.20 (1.09 to 1.31) | 11.4 (10.3 to 12.6)                     | 0.95 (0.77 to 1.17) |
| 2010-2013                                        | 23.7 (22.8 to 24.6)          | 1.59 (1.46 to 1.74) | 16.0 (14.6 to 17.4)                     | 1.36 (1.11 to 1.68) |
| <b>Townsend deprivation index quantile</b>       |                              |                     |                                         |                     |
| 1                                                | 18.7 (17.6 to 19.9)          | 1                   | 13.3 (11.5 to 15.2)                     | 1                   |
| 2                                                | 19.1 (17.9 to 20.3)          | 1.00 (0.90 to 1.12) | 12.8 (10.9 to 14.6)                     | 0.94 (0.74 to 1.19) |
| 3                                                | 19.3 (18.2 to 20.4)          | 1.02 (0.92 to 1.14) | 14.0 (12.2 to 15.8)                     | 1.05 (0.84 to 1.31) |
| 4                                                | 20.4 (19.4 to 21.5)          | 1.09 (0.98 to 1.21) | 13.4 (11.7 to 15.1)                     | 0.98 (0.79 to 1.23) |
| 5                                                | 20.0 (18.9 to 21.2)          | 1.06 (0.95 to 1.18) | 13.3 (11.4 to 15.1)                     | 0.97 (0.77 to 1.23) |
| <b>Any prior record suggestive of depression</b> |                              |                     |                                         |                     |
| No                                               | 9.6 (8.9 to 10.2)            | 1                   | 8.8 (7.6 to 9.9)                        | 1                   |
| Yes                                              | 24.9 (24.2 to 25.6)          | 3.02 (2.78 to 3.29) | 15.7 (14.7 to 16.8)                     | 1.91 (1.62 to 2.27) |
